# Supplementary material for: Novel MnO2/reduced graphene oxide micromotors for the highly efficient removal of tetrabromobisphenol A in aqueous solution
Source: Royal Society of Chemistry journal article supplement (doi:10.1039/d2ew00221c), 2022-01-01
Supplement: d2ew00221c4.pdf [file d2ew00221c4.pdf]

Supplementary Information for

**Novel MnO<sub>2</sub>/reduced graphene oxide micromotors for  
high-efficient removal of tetrabromobisphenol A in aqueous**

Zengze Liu <sup>abc</sup>, Fang Tan\* <sup>a</sup>, Ziwei Zheng <sup>a</sup>, Yanlin Liu <sup>a</sup>, Yangwei Chen <sup>a</sup>, LufengChen <sup>c</sup>,

Yanqun Liu\* <sup>b c</sup>

---

<sup>a</sup>School of Optoelectronic Materials & Technology, Jiangnan University, Wuhan, Hubei 430056, P. R. China. E-mail: [yanxizaof@sina.com](mailto:yanxizaof@sina.com)

<sup>b</sup>School of Medicine, Jiangnan University, Wuhan, Hubei 430056, P. R.China. E-mail: [hbliuyanqun@163.com](mailto:hbliuyanqun@163.com)

<sup>c</sup>School of Environment and Health, Jiangnan University, Wuhan, Hubei 430056, P. R. China.

**Video S1.** Micromotor in 3.0% H<sub>2</sub>O<sub>2</sub> moving trajectory.

**Video S2.** Micromotor in 6.0% H<sub>2</sub>O<sub>2</sub> moving trajectory.

**Video S3.** Micromotor in 9.0% H<sub>2</sub>O<sub>2</sub> moving trajectory.

**Text S1.** Experimental methods for identification of intermediate products of TBBPA

In order to determine the degradation products of TBBPA, the experiment was divided into 8 groups. 12 MnO<sub>2</sub>/rGO micromotors (length 4 mm) were immersed in 10 mL TBBPA solution (100mg/mL) with 10 mL H<sub>2</sub>O<sub>2</sub> concentrations of 9.0% at pH=3.0 in each group. In each experimental group, the micromotors were placed in the solution for 0 min, 1 min, 5 min, 10 min, 30 min, 60 min, 90 min and 120 min respectively. Then the micromotors were taken out and the reaction solution was transferred to a 50 mL centrifuge tube. 8 mL dichloromethane was added into the centrifuge tube and then the mixed solution was ultrasonic extracted for 10min. The extraction was transferred to the separation funnel and stood for 1 min. The extract of lower layer was collected. The extract and collect process was repeated for three times. Finally, the extract was concentrated by nitrogen purging and quantified to 1 mL to be analyzed by GC/MS.

(p0)

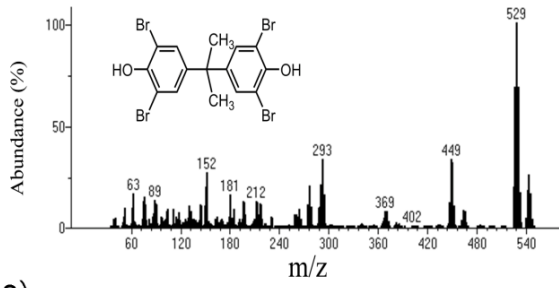

(p1)

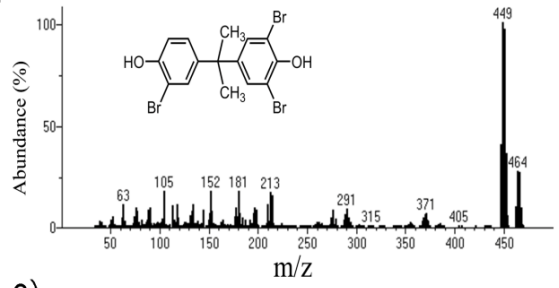

(p2)

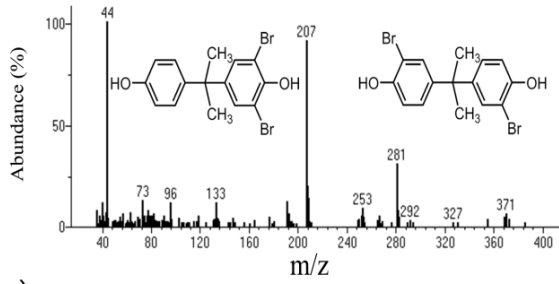

(p3)

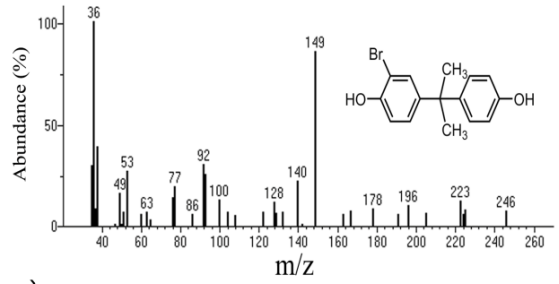

(p4)

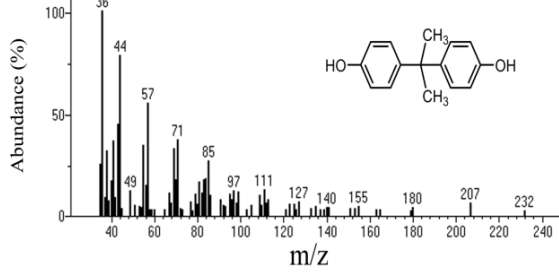

(p5)

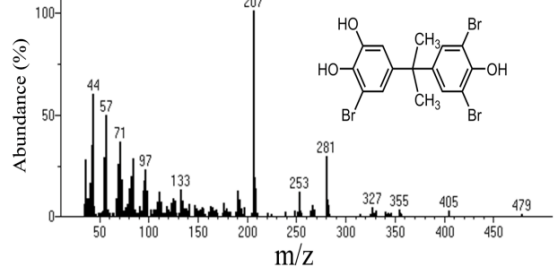

(p6)

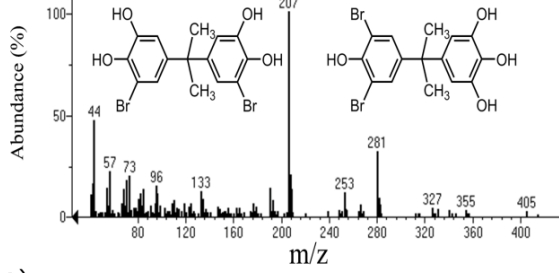

(p7)

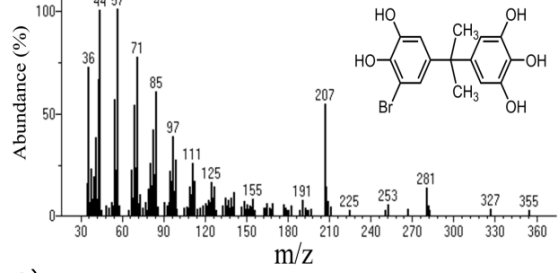

(p8)

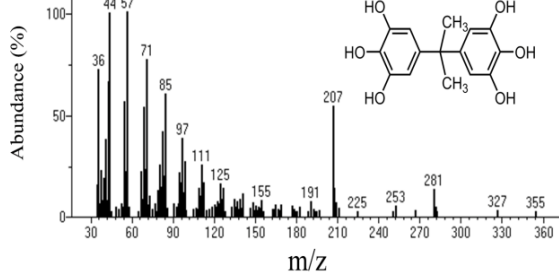

(p9)

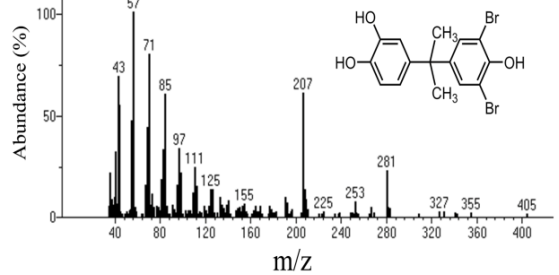

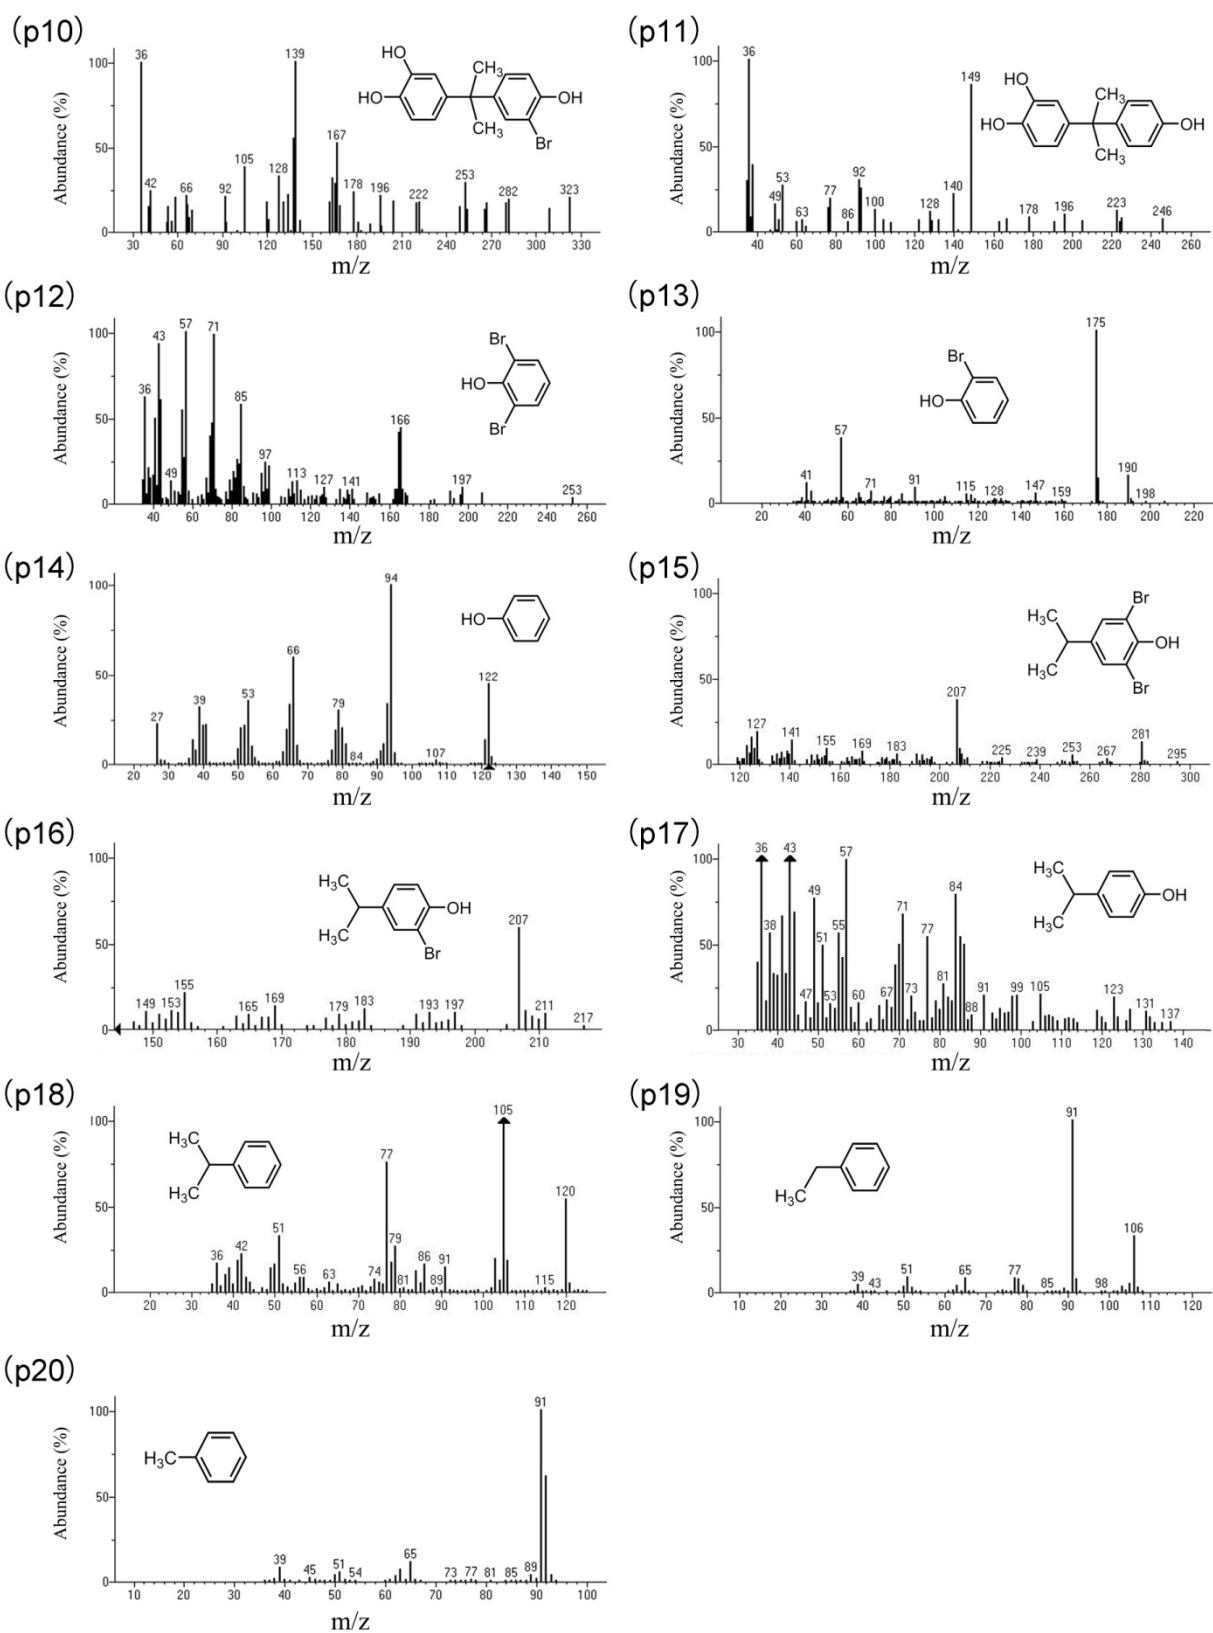

**Figure S1.** Mass spectrum of potential intermediates from the degradation of TBBPA by MnO<sub>2</sub>/rGO micromotors.
